# Supplementary material for: Acid-vacuo heat treated low cost banana stems fiber for efficient biosorption of Hg(ii)
Source: Royal Society of Chemistry journal article supplement (doi:10.1039/c4ra14320e), 2015-01-01
Supplement: c4ra14320e1.pdf [file c4ra14320e1.pdf]

### Supplementary Table S1

Two- and three-parameter biosorption isotherm models

| Two-parameters model   | Non-linear form                                                        | Linear form                                                    |
|------------------------|------------------------------------------------------------------------|----------------------------------------------------------------|
| Freundlich             | $q_e = K_F C_e^{1/n}$                                                  | $\log q_e = \log K_F + \frac{1}{n} \log C_e$                   |
| Langmuir               | $q_e = \frac{q_m K_L C_e}{1 + K_L C_e}$<br>$R_L = \frac{1}{K_L + C_o}$ | $\frac{1}{q_e} = \frac{1}{q_m} + \frac{1}{b q_m C_e}$          |
| Temkin                 | $q_e = B \ln (AC_e)$                                                   | $q_e = \frac{RT}{B} \ln A + \left(\frac{RT}{B}\right) \ln C_e$ |
| Three-parameters model | Non-linear form                                                        |                                                                |
| Redlich-Peterson       | $q_e = \frac{AC_e}{1 + BC_e^g}$                                        |                                                                |
| Koble-Corrigan         | $q_e = \frac{AC_e^n}{1 + BC_e^n}$                                      |                                                                |
| Sips                   | $q_e = \frac{q_m s K_s C_e^{ms}}{1 + K_s C_e^{ms}}$                    |                                                                |

### Supplementary Table S2

Four cycles of Hg(II) adsorption-desorption with 0.1 M HCl as desorbing agent

| Cycles | Biosorption (%) | Recovery (%) |
|--------|-----------------|--------------|
| 1      | 95.2            | 97.4         |
| 2      | 94              | 95.6         |
| 3      | 88              | 91.7         |
| 4      | 85.2            | 85.6         |

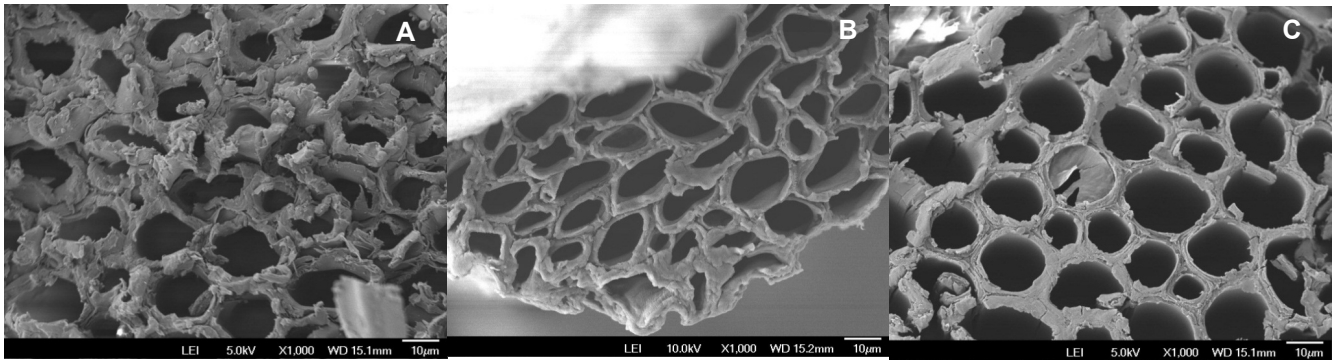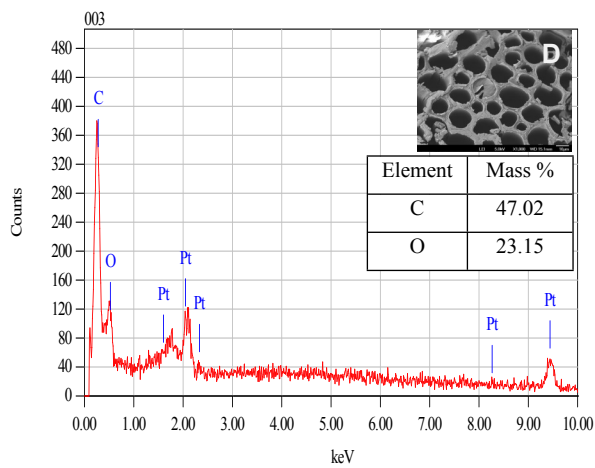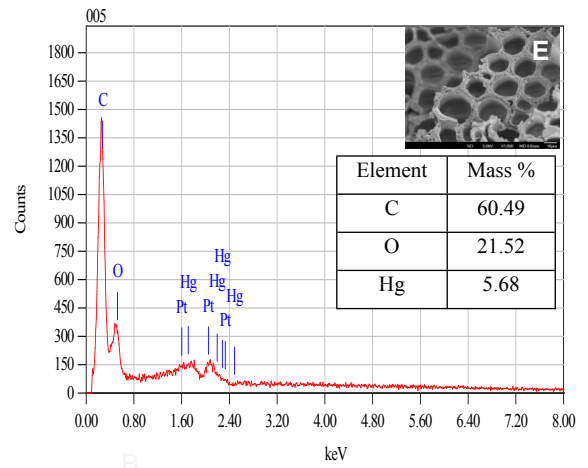

**Supplementary Fig. S1** : FESEM images of a) BSF-raw b) BSF-NaOH and c) BSF-HCl and EDX analysis of d) BSF-HCl and e) Hg-BSF-HCl

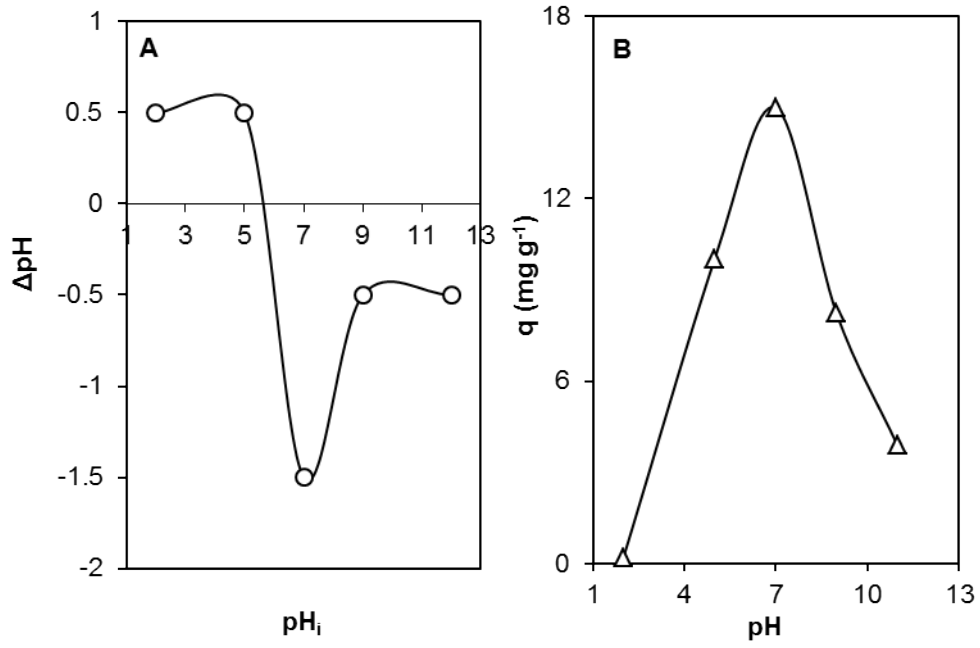

**Supplementary Fig. S2 :** A)  $\text{pH}_{\text{zpc}}$  of BSF-HCl and B) effect of pH on the biosorption of Hg(II) on activated BSF-HCl

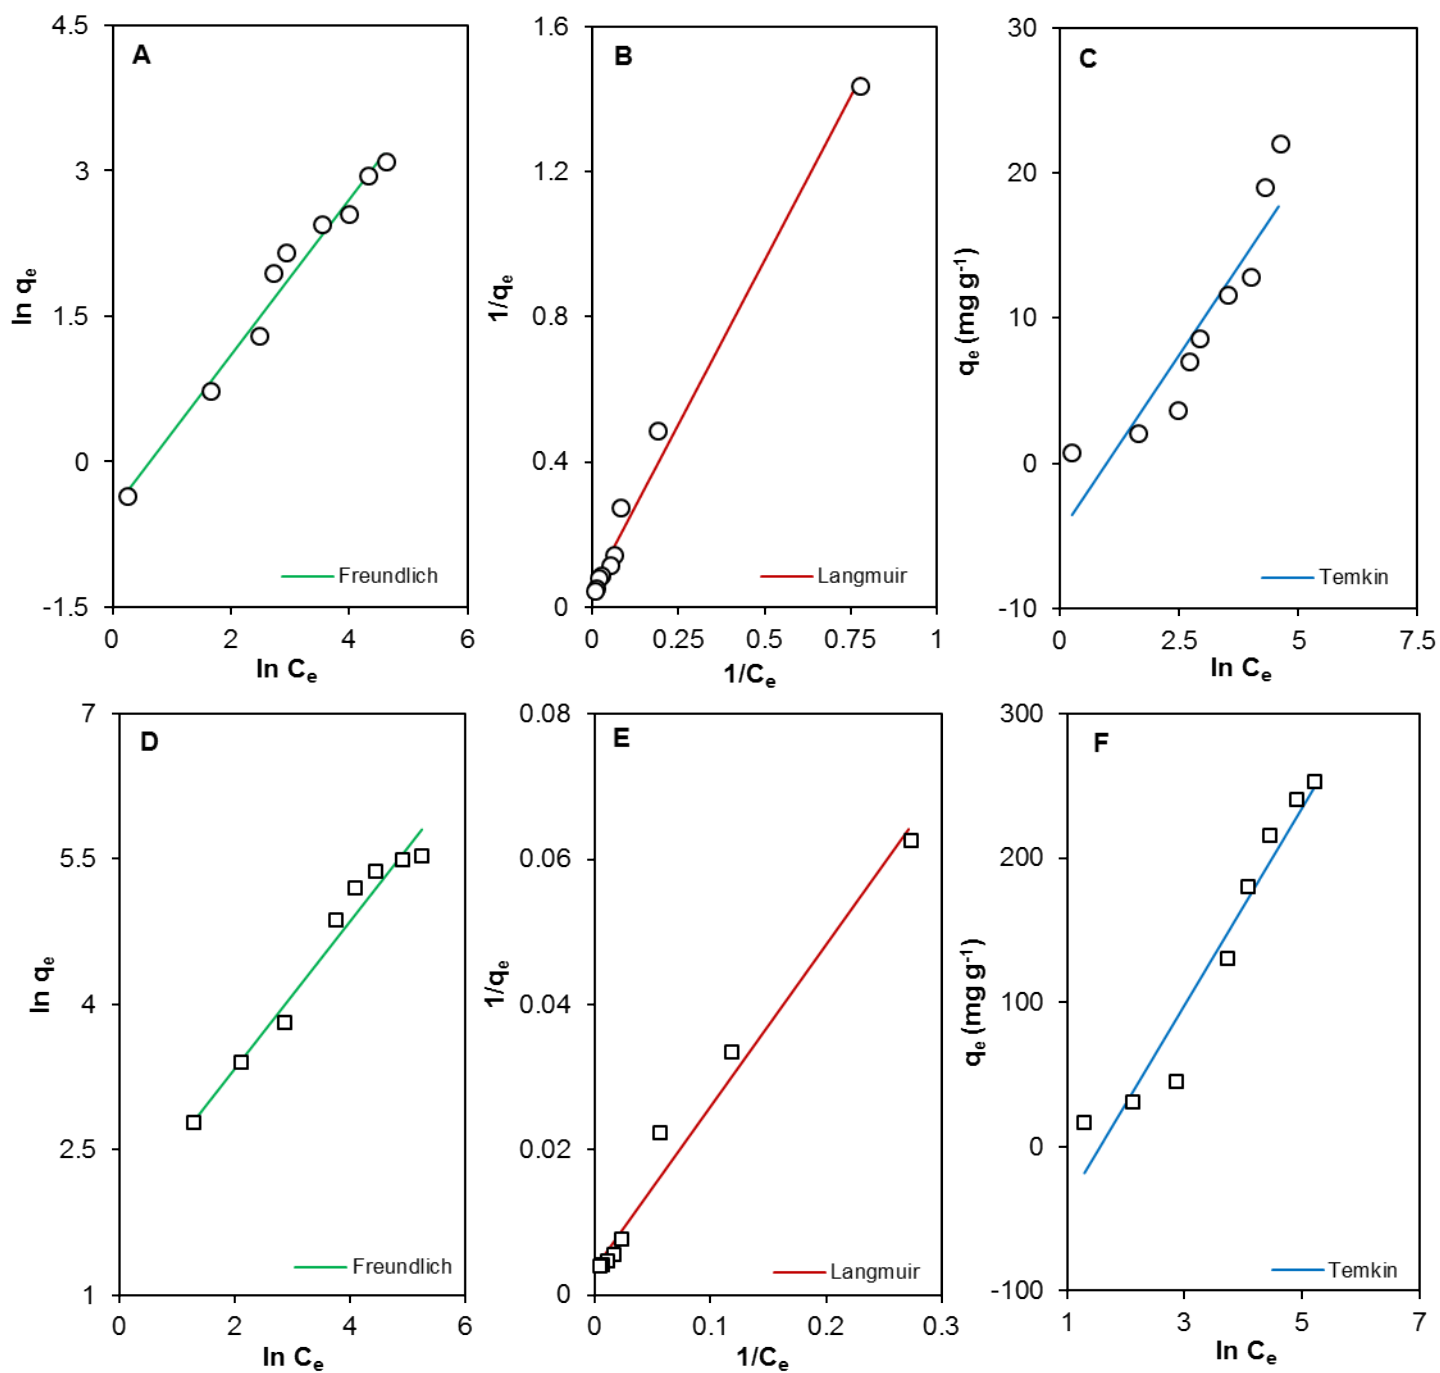

**Supplementary Fig. S3:** The linear biosorption isotherms for the biosorption of Hg(II) onto (○) fresh BSF-HCl and (□) activated BSF-HCl at different initial Hg(II) ions concentration: A,D) Freundlich, B,E) Langmuir and C,F) Temkin

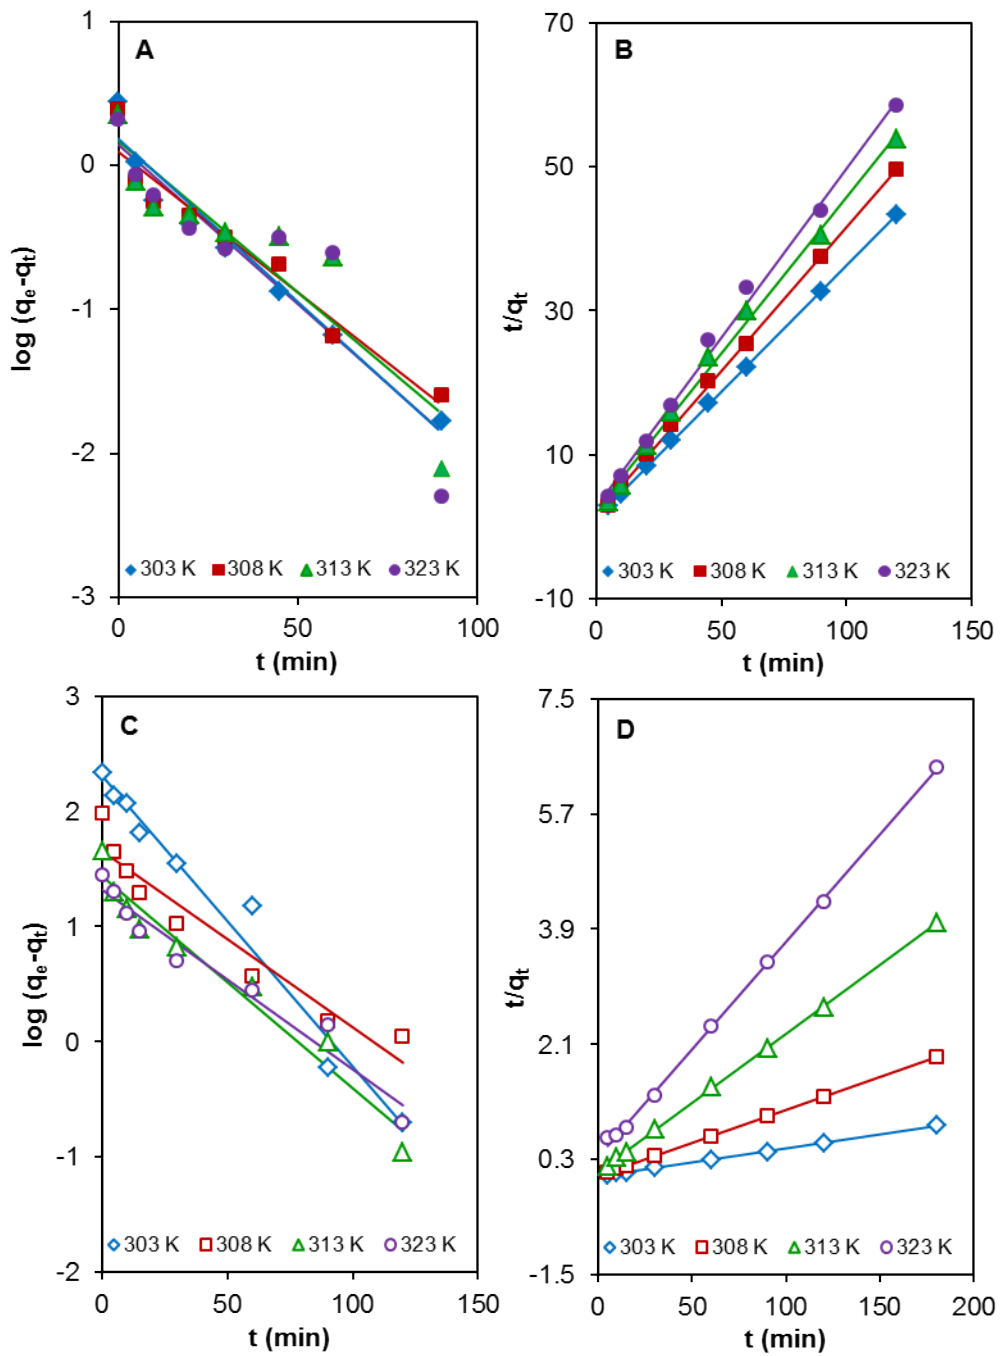

**Supplementary Fig. S4:** Kinetics of the biosorption of Hg(II) onto fresh BSF-HCl (solid symbols) and activated BSF-HCl (open symbols) at different temperatures using linear method

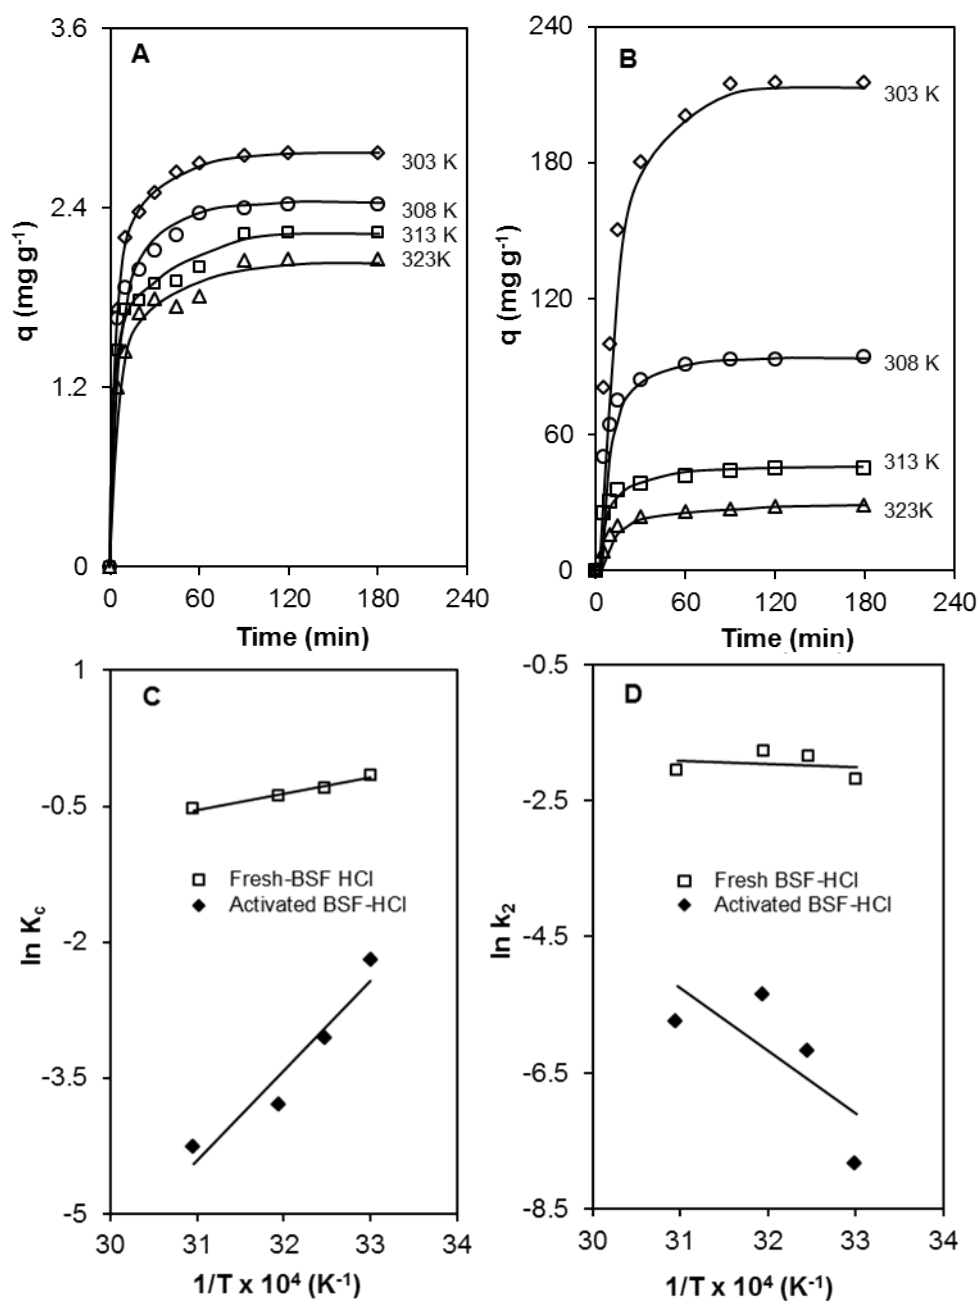

**Supplementary Fig. S5:** Effect of temperature on the biosorption of Hg(II) on A) Fresh BSF-HCl and B) Activated BSF-HCl for estimation of C) thermodynamic parameters (plot of  $\ln K_c$  vs  $1/T$ ) and D) activation energy (plot of  $\ln k_2$  vs  $1/T$ )
